# Supplementary material for: Microscale electrohydrodynamic printing of conductive silver features based on in situ reactive inks
Source: Royal Society of Chemistry journal article supplement (doi:10.1039/c7tc04114d), 2017-12-11
Supplement: c7tc04114d1.pdf [file c7tc04114d1.pdf]

## Electronic Supplementary information (ESI)

### Microscale electrohydrodynamic printing of conductive silver features based on *in situ* reactive inks

Qi Lei, Jiankang He\*, Bing Zhang, Jinke Chang, Dichen Li

State key laboratory for manufacturing systems engineering, Xi'an Jiaotong University, Xi'an  
710049, China

E-mail: [jiankanghe@mail.xjtu.edu.cn](mailto:jiankanghe@mail.xjtu.edu.cn)

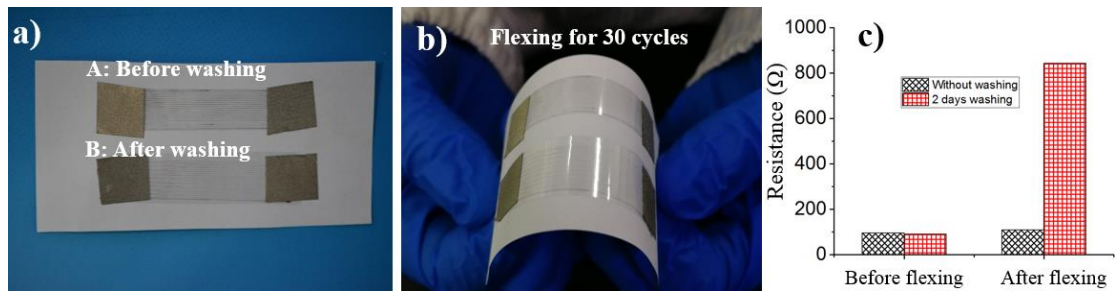

**Fig. S1** Flexibility test of the Ag-PEO lines before and after washing. (a) Two arrays of lines: A (before washing) and B (after washing). (b) The samples were flexed for 30 cycles. (c) The resistance of the printed line arrays before and after flexing.

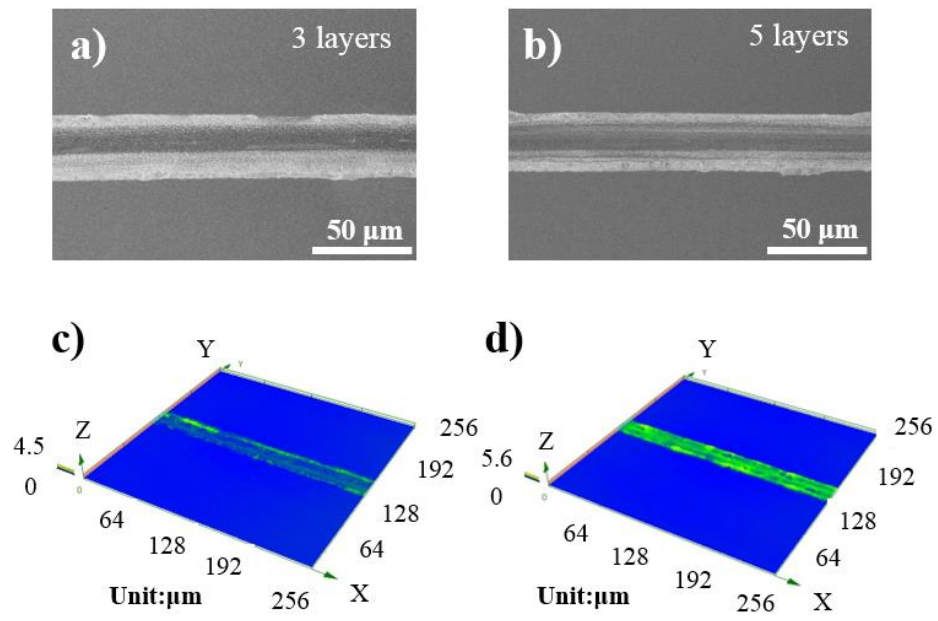

**Fig. S2** Electrohydrodynamically printed multilayer Ag-PEO lines. (a-b) SEM images of 3 and 5 layer Ag-PEO lines. (c-d) 3D profiles of 3 and 5 layer Ag-PEO lines.
